# Supplementary material
Source: PubMed Central journal article supplement (PMC9153933)
Supplement: mmc2.pdf [file mmc2.pdf]

Revision 1.0, Last updated: June 21, 2021

- » *Chem Catalysis* has compiled these checklists to foster improved rigor and reproducibility in research and increased clarity and transparency in data reporting.
- » Authors are encouraged to include the completed checklists as supplemental information at the time of submission. The checklists will be included in the supplemental information of published articles.
- » Rather than check off all items on the list, authors should mark only those items that apply to their article.

**The following checklists are relevant for this manuscript:**

**[Homogeneous catalysis checklist](#)**

**[Heterogeneous catalysis checklist](#)**

**[Biocatalysis checklist](#)**

**[Electrochemistry checklist](#)**

**[Photocatalysis checklist](#)**

Revision 1.0, Last updated: June 29, 2021

## Catalyst synthesis

Novel methods are provided in full detail

Comprehensive literature references are included to allow reproducibility

## Catalyst characterization

Elemental analysis

NMR spectroscopy

High-resolution mass spectrometry (HRMS)

Infrared spectroscopy

Crystallography

Other

The data are available in a repository

## Catalyzed reaction

Reaction conditions and complete experimental procedure

Type of reactor (e.g., batch, semi-batch, continuous)

Reactor size

Operating temperature

Operating pressure

Solvent

Atmosphere

Mass balance

Catalyst loading (mass and/or concentration and reaction volume)

Reactant concentration at the beginning of the reaction

Mass and/or heat transfer and mixing effects

## Catalytic analysis

### Activity

Reaction kinetics

Turnover frequency

Turnover number

Product selectivity

Space-time yield

Kinetics of deactivation

## Reaction intermediates

Isolated

Detected *in situ*

## Product or compound characterization

### Identity

$^1\text{H}$  and  $^{13}\text{C}$  NMR spectroscopy

Multiplicity and coupling constants (required for  $^1\text{H}$ ; as needed for heteronuclear spectra)

Spectra of all compounds are provided with integration of all resonances

Other NMR experiments (heteronuclear:  $^{11}\text{B}$ ,  $^{19}\text{F}$ ,  $^{31}\text{P}$ , etc.; 2D correlation spectroscopy: COSY, NOESY, HSQC, HMBC, etc.)

HRMS, infrared (IR) absorption spectroscopy, and/or UV-vis spectroscopy

Chiral gas chromatography (GC) and/or high-performance liquid chromatography (HPLC)

X-ray diffraction (powder and/or single crystal)

### Purity

Isolated yields

High-field  $^1\text{H}$  NMR spectra

1D proton-decoupled  $^{13}\text{C}$  NMR spectra

Combustion elemental analysis

Quantitative GC or HPLC analytical data

Electrophoretic analytical data

### **Biomacromolecules**

Sequence

Mass spectral data

### **Polymers**

Dispersity

Transition temperatures

Modulus

## Comparing catalysts

Benchmarking table or figure (either other catalysts investigated in this study or previous literature reports with references)

## Control experiments

Reaction without catalyst

## Quantification and statistical analysis

The paper reports statistical analysis

There is a statement of where the statistical parameters (e.g., exact value of  $n$  samples, standard error of the mean, standard deviation) are reported in the paper

There is a statement of whether any methods were used to determine whether the data met the assumptions of the statistical approach

### If calculations were conducted

Software details, including version number

The program package (with revision number) used

Details of all basis sets and exchange-correlation functionals or wave function methods

Pseudopotential

Force-field parameters

Ensemble

Temperature and/or pressure (if different from standard conditions)

Simulation cell details (if periodic calculations) or details if using molecular dynamics or Monte Carlo

Description of all enthalpic and entropic corrections to electronic energies

Table of Cartesian coordinates (angstrom), calculated energies (Hartree), and lowest frequency of all stationary points

Data (including dynamic movie and coordinates) and code are available in a repository

### Sustainability remarks

"Principles of green chemistry" have been considered in designing and conducting the research

For more information, please see <https://www.acs.org/content/acs/en/greenchemistry/principles/12-principles-of-green-chemistry.html>.

I verify that, to the best of my knowledge, this form is completed accurately in agreement with all co-authors

Submitting author name:

For general queries or feedback regarding this form, please email [catalysis@cell.com](mailto:catalysis@cell.com)

Revision 1.0, Last updated: June 29, 2021

## Catalyst synthesis

Novel methods are provided in full detail

Comprehensive literature references are included to allow reproducibility

## Characterization of new materials

Chemical composition of the catalyst

Phase and crystallinity

Morphology

Thickness analysis for two-dimensional materials (e.g., using atomic-force microscopy)

Particle size and size distribution (both high-res and low-res transmission electron microscopy [TEM])

Characterization and analysis of pore size

Exposed facets and orientation

Defect structure

Analysis of edge or vertex sites

Analysis of valence state

## Catalyzed reaction

Reaction conditions and complete experimental procedure

Type of reactor (e.g., flow type, batch type)

Reactor size

Operating temperature, operating pressure, solvent, atmosphere

Mass balance

Catalyst loading (mass and/or concentration and reaction volume)

Reactant concentration at the beginning of the reaction

Mass and/or heat transfer and mixing effects

## Catalytic analysis

### Activity

Reaction kinetics

Turnover frequency

Turnover number

Product selectivity

Space-time yield

Reactant concentration at the beginning of the reaction

Kinetics of deactivation

### Reaction intermediates

Isolated

Detected *in situ*

## Product or compound characterization

### Identity

$^1\text{H}$  and  $^{13}\text{C}$  NMR spectroscopy

Multiplicity and coupling constants (required for  $^1\text{H}$ ; as needed for heteronuclear spectra)

Spectra of all compounds are provided with integration of all resonances

Other NMR experiments (heteronuclear:  $^{11}\text{B}$ ,  $^{19}\text{F}$ ,  $^{31}\text{P}$ , etc.; 2D correlation spectroscopy: COSY, NOESY, HSQC, HMBC, etc.)

HRMS, infrared (IR) absorption spectroscopy, and/or UV-vis spectroscopy

Chiral gas chromatography (GC) and/or high-performance liquid chromatography (HPLC)

X-ray diffraction (powder and/or single crystal)

### Purity

Isolated yields

High-field  $^1\text{H}$  NMR spectra

1D proton-decoupled  $^{13}\text{C}$  NMR spectra

Combustion elemental analysis

Quantitative GC or HPLC analytical data

Electrophoretic analytical data

### Biomacromolecules

Sequence

Mass spectral data

### Polymers

Dispersity

Transition temperatures

Modulus

## Study of the catalyst after reaction

Have the following analyses been performed?

Hot filtration

Scanning electron microscopy, TEM, XRD, inductively coupled plasma spectrometry, loading of catalyst after reaction

## Catalyst stability assessment

Does the paper report any of the following?

Long-term stability test, including test conditions

Recyclability test

## Comparing catalysts

Benchmarking table or figure (other catalysts investigated in this study and/or previous literature reports with references)

## Control experiments

Reaction without catalyst

## Quantification and statistical analysis

The paper reports statistical analysis

There is a statement of where the statistical parameters (e.g., exact value of  $n$  samples, standard error of the mean, standard deviation) are reported in the paper

There is a statement of whether any methods were used to determine whether the data met the assumptions of the statistical approach

## If calculations were conducted

Software details, including version number

Details of all basis sets and exchange-correlation functionals or wave function methods

k-point and supercell size (if doing periodic plane wave calculations)

Convergence criteria of the force and energy

Description of all enthalpic and entropic corrections to electronic energies

Definitions of computed physical quantities

Pseudopotential (if applicable)

Data and code are available in a repository

## If molecular dynamics calculations were conducted

All basis sets and functionals

Pseudopotential

Force-field parameters

Ensemble

Temperature and/or pressure (if different from standard conditions)

Data (including dynamic movie and coordinates) and code are available in a repository

## Sustainability remarks

"Principles of green chemistry" have been considered in designing and conducting the research

For more information, please see <https://www.acs.org/content/acs/en/greenchemistry/principles/12-principles-of-green-chemistry.html>.

I verify that, to the best of my knowledge, this form is completed accurately in agreement with all co-authors

Submitting author name:

For general queries or feedback regarding this form, please email [catalysis@cell.com](mailto:catalysis@cell.com)

Revision 1.0, Last updated: June 29, 2021

## Catalyst identity

The name from the IUBMB Enzyme List to identify the enzyme

The NCBI Taxonomy ID

A naturally occurring variant

The localization within the cell

Any post-translational modification

The full protein sequence and the appropriate NCBI GenBank or UniProt accession code

## Preparation

Novel methods are provided in full

Comprehensive literature references are included to allow reproducibility

Artificial modification

Enzyme or protein purity

Metalloenzyme

## Storage conditions

Storage temperature

Atmosphere if not air

pH (if stored in solution)

Buffer and concentrations (including counter-ion)

Metal salt(s) and concentrations

Enzyme or protein concentration

Statement about observed loss of activity under the above conditions

Statement about the thawing procedure

## Assay conditions

Substrate purity

Measured reaction as a stoichiometrically balanced equation

Assay temperature

Assay pressure

Atmosphere if not air

Assay pH

Buffer and concentrations

Metal salt(s) and concentrations



Coupled assay components  
Substrate and concentration ranges  
Enzyme or protein concentration  
Total ionic strength of assay mixture

## Activity

Measurements of initial rates of the reaction  
Proportionality between initial velocity and enzyme concentration  
Enzyme activity expressed as  $k_{\text{cat}}$  (in  $\text{s}^{-1}$  or  $\text{min}^{-1}$ ) or international unit (1 IU =  $1 \mu\text{mol min}^{-1}$ ); katal ( $\text{mol/s}$ ) may alternatively be used as a unit of activity (conversion factor 1 unit = 16.67 nkat)  
Turnover number

## Methodology

Assay method  
Type of assay  
Reaction-stopping procedure  
Direction of the assay  
Reactant determined  
Concentrations of free metal cations  
Reaction equilibrium constant

## Kinetic parameters

$k_{\text{cat}}$  (in  $\text{s}^{-1}$  or  $\text{min}^{-1}$ )  
 $V_{\text{max}}$   
 $K_{\text{m}}$  units or concentration necessary (e.g., mM)  
 $k_{\text{cat}}/K_{\text{m}}$  as concentration per time (e.g.,  $\text{mM}^{-1} \text{s}^{-1}$ )  
 $S_{0.5}$  as concentration (e.g., mM)  
Hill coefficient, saturation ratio (RS), or other coefficients of cooperativity  
Model used to determine the parameters  
High-substrate inhibition, if observed, with  $K_{\text{i}}$  value

## Inhibition or activation data

Time dependence and reversibility  
Inhibition ( $K_{\text{i}}$  units necessary)

## Comparing catalysts

Benchmarking table or figure (other catalysts investigated for this study and/or previous literature reports with references)

## Control experiments

Reaction without catalyst

## Quantification and statistical analysis

The article reports a statistical analysis

There is a statement of where the statistical parameters (e.g., exact value of n samples, standard error of the mean, standard deviation) are reported in the paper

There is a statement of whether any methods were used to determine whether the data met the assumptions of the statistical approach

## Sustainability remarks

"Principles of green chemistry" have been considered in designing and conducting the research

For more information, please see <https://www.acs.org/content/acs/en/greenchemistry/principles/12-principles-of-green-chemistry.html>.

I verify that, to the best of my knowledge, this form is completed accurately in agreement with all co-authors

Submitting author name:

For general queries or feedback regarding this form, please email [catalysis@cell.com](mailto:catalysis@cell.com)

Revision 1.0, Last updated: June 29, 2021

## Reaction conditions

- Cell type (H-cell, gas-diffusion type, etc.)
- Cell, electrode, and membrane material
- Currents
- Electrode geometric area ( $\text{cm}^2$ )
- Reactants
- Electrolyte
- Scan rate for cyclic voltammograms
- Dependence of current on scan or stir rate
- Mass transfer conditions (rotation rate for rotating disc electrode, stir bar, flow rate in flow cells)
- pH for aqueous solutions (start, during reaction, end)
- Treatment or polishing of the electrode
- Three-electrode or two-electrode configuration (half-cell or full cell, respectively)
- Bias potential and, for three-cell configuration, the reference electrode used

## Reporting data

- Polarization plot (cell voltage versus current or current density)
- Electrochemical impedance spectroscopy (EIS)
- Normalized electrochemical surface area activity
- Mass activity
- Specific activity
- Mass balance
- Faradic efficiency
- Overpotential (including clear information about how the thermodynamic potential was determined, estimated, or calculated)
- Electrochemically active surface area (ECSA,  $\text{A}/\text{cm}^2_{\text{ECSA}}$ )
- Stability test conditions
- Current densities
- Vendor information, photographs, and/or schemes of any custom apparatus

## If calculations were conducted

- The program package (with revision number) used
- All basis sets and functionals

Description of all corrections

Table of Cartesian coordinates (angstrom), calculated energies (Hartree), and lowest frequency of all stationary points

Data (including simulation, scripts, and raw data) and code are available in a repository

I verify that, to the best of my knowledge, this form is completed accurately in agreement with all co-authors

Submitting author name:

For general queries or feedback regarding this form, please email [catalysis@cell.com](mailto:catalysis@cell.com)

Revision 1.0, Last updated: June 29, 2021

## Reaction conditions

- Photocatalyst loading
- Substrate concentration
- Sacrificial donor
- Hole or electron scavengers
- Other additives
- Reaction vessel size, material, and thickness of glassware
- Reaction setup
- Pictures or schemes
- Source and wavelength of light used for illumination
- Wavelength distribution of light
- Quantum yields
- Apparent quantum yields or photonic efficiencies
- Photocatalytic efficiencies
- Optical irradiance at the sample ( $\text{mW}\cdot\text{cm}^{-2}$ )
- Total optical power impinging on the sample if liquid ( $\text{mW}\cdot\text{mL}^{-1}$ )

## Comparing catalysts

- Benchmarking table or figure (other catalysts investigated for this study and/or previous literature reports with references)

## Control experiments

- Reaction without catalyst
- Reaction without light (on/off test and reaction conducted completely in the dark)

I verify that, to the best of my knowledge, this form is completed accurately in agreement with all co-authors

Submitting author name:

For general queries or feedback regarding this form, please email [catalysis@cell.com](mailto:catalysis@cell.com)
